# Supplementary material for: Characteristics of sub-10 nm particle emissions from in-use commercial aircraft observed at Narita International Airport
Source: Copernicus journal article supplement (doi:10.5194/acp-2020-395), 2020-05-13
Supplement: Supplementary file 1 [file 20180215_Meteorology_v1.xls]

## Sheet: 20180215_Meteorology_v1
Meteorology_center_time_v1	WD_Direction_v1	WS_ms_v1	TEMP_C_v1	HUM_v1
1899-12-31	SW	2.8	8.8	43
1899-12-31 00:01:00	WSW	2.6	8.8	43
1899-12-31 00:02:00	SW	3.1	8.8	43
1899-12-31 00:03:00	SW	1.6	8.8	43
1899-12-31 00:04:00	SW	2.5	8.8	44
1899-12-31 00:05:00	WSW	2.3	8.7	44
1899-12-31 00:06:00	WSW	2.2	8.7	44
1899-12-31 00:07:00	SW	1.4	8.7	44
1899-12-31 00:08:00	SW	2.7	8.7	44
1899-12-31 00:09:00	SW	1.8	8.7	44
1899-12-31 00:10:00	SW	1.2	8.6	44
1899-12-31 00:11:00	SW	1.5	8.6	45
1899-12-31 00:12:00	SW	1.8	8.7	45
1899-12-31 00:13:00	SW	2.2	8.7	45
1899-12-31 00:14:00	SW	1.8	8.7	45
1899-12-31 00:15:00	SW	1.5	8.6	45
1899-12-31 00:16:00	SW	1.8	8.6	45
1899-12-31 00:17:00	WSW	1.7	8.6	45
1899-12-31 00:18:00	WSW	1.3	8.6	45
1899-12-31 00:19:00	WSW	2	8.6	45
1899-12-31 00:20:00	SSW	1.8	8.6	46
1899-12-31 00:21:00	SW	1.2	8.6	46
1899-12-31 00:22:00	WSW	2	8.5	46
1899-12-31 00:23:00	WSW	2.2	8.6	46
1899-12-31 00:24:00	SW	2	8.5	46
1899-12-31 00:25:00	WSW	4.3	8.6	46
1899-12-31 00:26:00	WSW	1.9	8.6	46
1899-12-31 00:27:00	SW	3	8.6	46
1899-12-31 00:28:00	SW	1.8	8.7	46
1899-12-31 00:29:00	SW	1.7	8.7	46
1899-12-31 00:30:00	SW	1.9	8.7	46
1899-12-31 00:31:00	SW	1.8	8.7	46
1899-12-31 00:32:00	WSW	1.7	8.7	46
1899-12-31 00:33:00	SW	1.6	8.6	47
1899-12-31 00:34:00	SW	1.5	8.7	47
1899-12-31 00:35:00	WSW	2.2	8.7	47
1899-12-31 00:36:00	SW	3	8.8	47
1899-12-31 00:37:00	SW	1.9	8.7	47
1899-12-31 00:38:00	SW	2.4	8.7	47
1899-12-31 00:39:00	WSW	2.3	8.8	47
1899-12-31 00:40:00	SW	3.8	8.8	47
1899-12-31 00:41:00	SSW	3.1	8.8	47
1899-12-31 00:42:00	SW	1.9	8.9	47
1899-12-31 00:43:00	SW	3.4	8.9	47
1899-12-31 00:44:00	WSW	4.3	8.9	47
1899-12-31 00:45:00	SW	3.7	9	47
1899-12-31 00:46:00	SW	2.8	9.1	46
1899-12-31 00:47:00	SW	3.4	9.1	46
1899-12-31 00:48:00	SW	2.3	9.1	46
1899-12-31 00:49:00	SW	2.3	9.1	47
1899-12-31 00:50:00	SW	2.5	9.1	47
1899-12-31 00:51:00	SW	2.8	9.1	47
1899-12-31 00:52:00	SW	2.8	9.1	47
1899-12-31 00:53:00	SW	2.8	9.1	47
1899-12-31 00:54:00	SW	3.3	9.1	47
1899-12-31 00:55:00	WSW	4.2	9.1	47
1899-12-31 00:56:00	SW	4	9.2	47
1899-12-31 00:57:00	SW	2.9	9.2	46
1899-12-31 00:58:00	SW	3.9	9.2	47
1899-12-31 00:59:00	WSW	4	9.2	47
1899-12-31 01:00:00	SW	4.1	9.2	47
1899-12-31 01:01:00	SW	3.9	9.3	46
1899-12-31 01:02:00	SW	4.8	9.3	46
1899-12-31 01:03:00	SW	4.4	9.3	46
1899-12-31 01:04:00	WSW	4.3	9.3	46
1899-12-31 01:05:00	SW	4.6	9.3	47
1899-12-31 01:06:00	WSW	3.1	9.3	47
1899-12-31 01:07:00	SW	3.7	9.3	47
1899-12-31 01:08:00	WSW	3.6	9.3	47
1899-12-31 01:09:00	SW	3.8	9.4	47
1899-12-31 01:10:00	WSW	3.4	9.4	47
1899-12-31 01:11:00	SW	2.7	9.3	47
1899-12-31 01:12:00	SW	2.9	9.3	47
1899-12-31 01:13:00	SW	3.3	9.4	47
1899-12-31 01:14:00	WSW	2.9	9.4	47
1899-12-31 01:15:00	WSW	3.2	9.4	47
1899-12-31 01:16:00	WSW	3.9	9.5	47
1899-12-31 01:17:00	SW	3.3	9.5	47
1899-12-31 01:18:00	SW	3.8	9.5	46
1899-12-31 01:19:00	WSW	4.1	9.5	47
1899-12-31 01:20:00	WSW	4.3	9.4	47
1899-12-31 01:21:00	SW	3.2	9.4	47
1899-12-31 01:22:00	WSW	2.6	9.4	47
1899-12-31 01:23:00	WSW	3	9.4	47
1899-12-31 01:24:00	WSW	3.9	9.4	47
1899-12-31 01:25:00	WSW	3.6	9.5	47
1899-12-31 01:26:00	WSW	4.3	9.5	47
1899-12-31 01:27:00	WSW	3	9.5	47
1899-12-31 01:28:00	WSW	3.8	9.5	47
1899-12-31 01:29:00	WSW	4.7	9.5	47
1899-12-31 01:30:00	WSW	4.2	9.5	47
1899-12-31 01:31:00	WSW	3.4	9.5	47
1899-12-31 01:32:00	WSW	2.1	9.4	47
1899-12-31 01:33:00	WSW	4.3	9.4	47
1899-12-31 01:34:00	SW	3.3	9.4	47
1899-12-31 01:35:00	WSW	3.4	9.5	47
1899-12-31 01:36:00	WSW	4.5	9.5	47
1899-12-31 01:37:00	WSW	4	9.5	47
1899-12-31 01:38:00	WSW	3.1	9.5	47
1899-12-31 01:39:00	WSW	4	9.5	47
1899-12-31 01:40:00	WSW	3.8	9.5	47
1899-12-31 01:41:00	SW	2.8	9.5	47
1899-12-31 01:42:00	WSW	3	9.5	47
1899-12-31 01:43:00	SW	4.5	9.5	47
1899-12-31 01:44:00	WSW	4	9.5	47
1899-12-31 01:45:00	SW	3.4	9.6	47
1899-12-31 01:46:00	WSW	2.5	9.5	47
1899-12-31 01:47:00	SW	2.7	9.4	47
1899-12-31 01:48:00	SW	3.2	9.4	47
1899-12-31 01:49:00	WSW	4.9	9.5	47
1899-12-31 01:50:00	SW	3.7	9.5	47
1899-12-31 01:51:00	WSW	3.7	9.5	47
1899-12-31 01:52:00	WSW	3	9.5	47
1899-12-31 01:53:00	SW	3.5	9.6	47
1899-12-31 01:54:00	SW	3.5	9.6	46
1899-12-31 01:55:00	SW	2.8	9.5	47
1899-12-31 01:56:00	WSW	2.7	9.6	46
1899-12-31 01:57:00	WSW	3.7	9.6	46
1899-12-31 01:58:00	SW	4	9.6	46
1899-12-31 01:59:00	WSW	4.4	9.6	46
1899-12-31 02:00:00	SW	3.2	9.6	46
1899-12-31 02:01:00	WSW	3.3	9.5	46
1899-12-31 02:02:00	SW	4.8	9.6	45
1899-12-31 02:03:00	WSW	3.7	9.5	46
1899-12-31 02:04:00	WSW	5.3	9.5	45
1899-12-31 02:05:00	WSW	3.2	9.6	45
1899-12-31 02:06:00	WSW	3.5	9.6	45
1899-12-31 02:07:00	WSW	1.9	9.6	45
1899-12-31 02:08:00	WSW	3	9.6	45
1899-12-31 02:09:00	WSW	2.4	9.6	45
1899-12-31 02:10:00	WSW	2.3	9.6	45
1899-12-31 02:11:00	WSW	3.4	9.6	45
1899-12-31 02:12:00	WSW	3.6	9.6	45
1899-12-31 02:13:00	WSW	5	9.5	45
1899-12-31 02:14:00	WSW	4.8	9.6	45
1899-12-31 02:15:00	SW	3.9	9.6	45
1899-12-31 02:16:00	WSW	3.7	9.6	45
1899-12-31 02:17:00	WSW	2.9	9.6	45
1899-12-31 02:18:00	WSW	2.9	9.6	45
1899-12-31 02:19:00	SW	4.9	9.6	45
1899-12-31 02:20:00	WSW	5.4	9.6	45
1899-12-31 02:21:00	WSW	4	9.6	45
1899-12-31 02:22:00	WSW	3.5	9.6	45
1899-12-31 02:23:00	WSW	1.9	9.6	45
1899-12-31 02:24:00	WSW	3.7	9.6	45
1899-12-31 02:25:00	SW	4.2	9.6	45
1899-12-31 02:26:00	SW	4.6	9.6	45
1899-12-31 02:27:00	WSW	3.9	9.6	45
1899-12-31 02:28:00	SW	3.5	9.6	45
1899-12-31 02:29:00	WSW	3.8	9.6	45
1899-12-31 02:30:00	SW	3.2	9.6	45
1899-12-31 02:31:00	WSW	3.4	9.6	45
1899-12-31 02:32:00	WSW	4.2	9.6	45
1899-12-31 02:33:00	WSW	4	9.6	45
1899-12-31 02:34:00	WSW	4.1	9.6	45
1899-12-31 02:35:00	WSW	3	9.6	45
1899-12-31 02:36:00	WSW	3.3	9.6	46
1899-12-31 02:37:00	SW	2.3	9.6	46
1899-12-31 02:38:00	SW	4.3	9.6	46
1899-12-31 02:39:00	SW	5	9.6	46
1899-12-31 02:40:00	WSW	2.4	9.6	46
1899-12-31 02:41:00	SW	2.7	9.6	46
1899-12-31 02:42:00	SW	2.9	9.6	46
1899-12-31 02:43:00	WSW	2.9	9.6	46
1899-12-31 02:44:00	SW	3	9.6	46
1899-12-31 02:45:00	WSW	3.7	9.6	46
1899-12-31 02:46:00	SW	3.1	9.6	46
1899-12-31 02:47:00	WSW	3.6	9.6	46
1899-12-31 02:48:00	WSW	3	9.6	46
1899-12-31 02:49:00	WSW	2.6	9.6	46
1899-12-31 02:50:00	WSW	2.4	9.6	47
1899-12-31 02:51:00	WSW	2.1	9.6	47
1899-12-31 02:52:00	SW	1.8	9.6	47
1899-12-31 02:53:00	WSW	2	9.5	47
1899-12-31 02:54:00	WSW	2.9	9.5	47
1899-12-31 02:55:00	WSW	2.6	9.6	47
1899-12-31 02:56:00	WSW	3	9.6	47
1899-12-31 02:57:00	WSW	1.8	9.6	47
1899-12-31 02:58:00	WSW	1.8	9.5	47
1899-12-31 02:59:00	SW	1.8	9.6	47
1899-12-31 03:00:00	WSW	1.7	9.6	47
1899-12-31 03:01:00	SW	2.2	9.6	47
1899-12-31 03:02:00	WSW	2.2	9.6	47
1899-12-31 03:03:00	SW	4.5	9.6	47
1899-12-31 03:04:00	SW	3	9.7	47
1899-12-31 03:05:00	WSW	1.8	9.6	47
1899-12-31 03:06:00	WSW	3.3	9.6	47
1899-12-31 03:07:00	SW	2.4	9.6	47
1899-12-31 03:08:00	SW	1.4	9.6	47
1899-12-31 03:09:00	SW	2.2	9.6	47
1899-12-31 03:10:00	WSW	3	9.6	47
1899-12-31 03:11:00	SW	2.7	9.6	47
1899-12-31 03:12:00	WSW	3.3	9.7	47
1899-12-31 03:13:00	SW	4.2	9.7	47
1899-12-31 03:14:00	SW	3	9.7	46
1899-12-31 03:15:00	SW	3.4	9.7	46
1899-12-31 03:16:00	SW	2.4	9.7	47
1899-12-31 03:17:00	SW	3.2	9.7	46
1899-12-31 03:18:00	WSW	3.3	9.7	46
1899-12-31 03:19:00	SW	4.1	9.7	46
1899-12-31 03:20:00	SW	5.2	9.8	46
1899-12-31 03:21:00	WSW	3.8	9.8	46
1899-12-31 03:22:00	SW	3.2	9.9	45
1899-12-31 03:23:00	SW	3.4	9.9	45
1899-12-31 03:24:00	SW	3.8	9.9	45
1899-12-31 03:25:00	SW	3.5	9.9	45
1899-12-31 03:26:00	SSW	3.8	10	45
1899-12-31 03:27:00	SW	3.8	10	45
1899-12-31 03:28:00	SW	3.1	10	45
1899-12-31 03:29:00	WSW	3.1	10	45
1899-12-31 03:30:00	SW	3.8	10	44
1899-12-31 03:31:00	WSW	3.5	10.1	44
1899-12-31 03:32:00	SW	2.5	10	45
1899-12-31 03:33:00	WSW	2.8	10.1	44
1899-12-31 03:34:00	SW	3.3	10.1	45
1899-12-31 03:35:00	SW	3	10.1	44
1899-12-31 03:36:00	SW	3.5	10.1	44
1899-12-31 03:37:00	SW	2.3	10	45
1899-12-31 03:38:00	SW	3.3	10.1	44
1899-12-31 03:39:00	SW	3.4	10.1	44
1899-12-31 03:40:00	SW	3.6	10.1	44
1899-12-31 03:41:00	SW	3.4	10.1	44
1899-12-31 03:42:00	SSW	2	10.1	44
1899-12-31 03:43:00	SW	2.8	10.1	44
1899-12-31 03:44:00	SSW	2	10.1	45
1899-12-31 03:45:00	SSW	3.3	10.1	45
1899-12-31 03:46:00	SW	2.7	10.1	45
1899-12-31 03:47:00	SSW	3.4	10.1	45
1899-12-31 03:48:00	SW	2.7	10.1	45
1899-12-31 03:49:00	SW	2.8	10.1	45
1899-12-31 03:50:00	SW	3.6	10.1	45
1899-12-31 03:51:00	SW	2.6	10.1	45
1899-12-31 03:52:00	SSW	2.6	10.1	45
1899-12-31 03:53:00	SW	2.6	10.1	45
1899-12-31 03:54:00	SSW	3.2	10.1	45
1899-12-31 03:55:00	SSW	2.6	10.1	45
1899-12-31 03:56:00	SW	2.5	10	46
1899-12-31 03:57:00	SW	1.8	10	46
1899-12-31 03:58:00	SSW	3.1	10	46
1899-12-31 03:59:00	SSW	1.9	10	46
1899-12-31 04:00:00	SW	2.4	10	47
1899-12-31 04:01:00	SW	3.7	10	47
1899-12-31 04:02:00	SW	2.6	10	47
1899-12-31 04:03:00	SW	2.6	10	47
1899-12-31 04:04:00	SW	2.2	10	47
1899-12-31 04:05:00	SW	2.3	10	48
1899-12-31 04:06:00	SW	3.4	10.1	48
1899-12-31 04:07:00	SW	2.9	10.1	48
1899-12-31 04:08:00	SW	3.3	10.1	48
1899-12-31 04:09:00	SW	2.9	10.1	48
1899-12-31 04:10:00	SW	3.1	10.1	48
1899-12-31 04:11:00	SW	2.4	10.1	48
1899-12-31 04:12:00	SW	1.6	10.1	48
1899-12-31 04:13:00	SW	2.5	10.1	48
1899-12-31 04:14:00	WSW	3.2	10.1	48
1899-12-31 04:15:00	SSW	1.8	10.1	48
1899-12-31 04:16:00	SW	2.6	10.1	49
1899-12-31 04:17:00	SW	3.9	10.1	49
1899-12-31 04:18:00	SW	2.4	10.1	49
1899-12-31 04:19:00	SW	2.3	10.1	49
1899-12-31 04:20:00	WSW	1.6	10.1	49
1899-12-31 04:21:00	SW	2.2	10.1	49
1899-12-31 04:22:00	SW	1.9	10.1	50
1899-12-31 04:23:00	SW	1.9	10	50
1899-12-31 04:24:00	SW	3.2	10	50
1899-12-31 04:25:00	SSW	2.2	10	50
1899-12-31 04:26:00	SW	3.4	10.1	50
1899-12-31 04:27:00	SW	3.4	10.1	50
1899-12-31 04:28:00	SSW	2.8	10.1	50
1899-12-31 04:29:00	SW	2	10	50
1899-12-31 04:30:00	SSW	2.1	10	51
1899-12-31 04:31:00	SW	2.5	10	51
1899-12-31 04:32:00	SW	2.7	10.1	51
1899-12-31 04:33:00	SW	2.5	10.1	51
1899-12-31 04:34:00	WSW	2.9	10.1	51
1899-12-31 04:35:00	WSW	2.2	10.1	51
1899-12-31 04:36:00	SSW	3	10.1	51
1899-12-31 04:37:00	SW	4	10.1	50
1899-12-31 04:38:00	SW	2.3	10.2	50
1899-12-31 04:39:00	SW	3.3	10.2	50
1899-12-31 04:40:00	SW	4.1	10.2	50
1899-12-31 04:41:00	SSW	3	10.3	50
1899-12-31 04:42:00	SW	2.9	10.3	50
1899-12-31 04:43:00	WSW	2.6	10.3	50
1899-12-31 04:44:00	WSW	3	10.3	50
1899-12-31 04:45:00	SW	2.6	10.3	50
1899-12-31 04:46:00	WSW	1.2	10.2	50
1899-12-31 04:47:00	WSW	4.3	10.3	49
1899-12-31 04:48:00	SSW	3	10.3	49
1899-12-31 04:49:00	SW	3	10.3	49
1899-12-31 04:50:00	SW	2.9	10.3	49
1899-12-31 04:51:00	WSW	4.9	10.4	49
1899-12-31 04:52:00	SW	3	10.4	49
1899-12-31 04:53:00	SW	2.7	10.4	49
1899-12-31 04:54:00	WSW	2.8	10.4	48
1899-12-31 04:55:00	SW	2.5	10.4	48
1899-12-31 04:56:00	WSW	2.5	10.4	48
1899-12-31 04:57:00	SW	4.1	10.5	48
1899-12-31 04:58:00	SW	3.9	10.5	48
1899-12-31 04:59:00	SW	3.6	10.5	48
1899-12-31 05:00:00	WSW	3.3	10.5	48
1899-12-31 05:01:00	SW	2.9	10.5	48
1899-12-31 05:02:00	SW	2.9	10.5	48
1899-12-31 05:03:00	SW	2.3	10.4	48
1899-12-31 05:04:00	WSW	2.9	10.4	48
1899-12-31 05:05:00	SW	3.8	10.4	48
1899-12-31 05:06:00	SW	2.9	10.4	48
1899-12-31 05:07:00	WSW	4.2	10.5	48
1899-12-31 05:08:00	SW	3.6	10.4	48
1899-12-31 05:09:00	WSW	2.7	10.4	48
1899-12-31 05:10:00	SW	3.6	10.4	48
1899-12-31 05:11:00	WSW	4.1	10.4	48
1899-12-31 05:12:00	SW	4.9	10.5	47
1899-12-31 05:13:00	WSW	2.8	10.5	47
1899-12-31 05:14:00	WSW	2.9	10.4	48
1899-12-31 05:15:00	WSW	2.5	10.4	48
1899-12-31 05:16:00	SW	2.7	10.4	48
1899-12-31 05:17:00	SW	3.8	10.4	48
1899-12-31 05:18:00	WSW	3.3	10.4	48
1899-12-31 05:19:00	SW	2.9	10.4	48
1899-12-31 05:20:00	SW	3.7	10.4	48
1899-12-31 05:21:00	WSW	4	10.4	48
1899-12-31 05:22:00	WSW	2.7	10.4	48
1899-12-31 05:23:00	SW	3.4	10.4	48
1899-12-31 05:24:00	SW	2.8	10.4	48
1899-12-31 05:25:00	SW	1.6	10.4	48
1899-12-31 05:26:00	WSW	2.3	10.3	48
1899-12-31 05:27:00	WSW	3.2	10.3	48
1899-12-31 05:28:00	WSW	2.3	10.3	48
1899-12-31 05:29:00	WSW	1.6	10.2	49
1899-12-31 05:30:00	WSW	2.3	10.2	49
1899-12-31 05:31:00	WSW	3.5	10.2	49
1899-12-31 05:32:00	WSW	2.6	10.3	49
1899-12-31 05:33:00	WSW	2.3	10.2	49
1899-12-31 05:34:00	WSW	2.4	10.2	49
1899-12-31 05:35:00	SW	2.6	10.2	49
1899-12-31 05:36:00	WSW	2.6	10.1	49
1899-12-31 05:37:00	WSW	2.2	10.1	49
1899-12-31 05:38:00	WSW	3.6	10.2	49
1899-12-31 05:39:00	WSW	2.1	10.2	49
1899-12-31 05:40:00	WSW	2.1	10.1	49
1899-12-31 05:41:00	WSW	2.2	10	49
1899-12-31 05:42:00	WSW	1.9	10	49
1899-12-31 05:43:00	WSW	2.9	10	49
1899-12-31 05:44:00	W	2.7	10	49
1899-12-31 05:45:00	WSW	2.9	10	49
1899-12-31 05:46:00	W	2.5	10	49
1899-12-31 05:47:00	WSW	1.9	10	49
1899-12-31 05:48:00	WSW	2.9	9.9	49
1899-12-31 05:49:00	WSW	2.3	9.9	50
1899-12-31 05:50:00	W	1.8	9.9	50
1899-12-31 05:51:00	W	2.5	9.9	49
1899-12-31 05:52:00	W	2.3	10	49
1899-12-31 05:53:00	W	1.8	9.9	50
1899-12-31 05:54:00	NW	1.2	9.9	50
1899-12-31 05:55:00	WNW	1.6	9.9	50
1899-12-31 05:56:00	NW	1.7	9.8	50
1899-12-31 05:57:00	NW	2.4	9.7	51
1899-12-31 05:58:00	NW	2.4	9.6	51
1899-12-31 05:59:00	NW	2.3	9.5	52
1899-12-31 06:00:00	NNW	2.3	9.3	52
1899-12-31 06:01:00	NNW	1.9	9.2	53
1899-12-31 06:02:00	NW	2	9	53
1899-12-31 06:03:00	NNW	1.8	8.9	54
1899-12-31 06:04:00	NW	2.2	8.8	55
1899-12-31 06:05:00	NW	2	8.6	55
1899-12-31 06:06:00	NW	1.8	8.6	56
1899-12-31 06:07:00	NW	1.8	8.5	56
1899-12-31 06:08:00	NW	1.6	8.5	56
1899-12-31 06:09:00	NW	1.1	8.5	56
1899-12-31 06:10:00	WNW	1.2	8.5	56
1899-12-31 06:11:00	NW	1.7	8.6	56
1899-12-31 06:12:00	NW	1.7	8.6	56
1899-12-31 06:13:00	NNW	1.7	8.4	56
1899-12-31 06:14:00	NNW	1.7	8.1	57
1899-12-31 06:15:00	NW	1.6	7.9	58
1899-12-31 06:16:00	NW	1.6	7.7	59
1899-12-31 06:17:00	NW	2	7.6	60
1899-12-31 06:18:00	NW	1.8	7.6	60
1899-12-31 06:19:00	NW	1.6	7.7	60
1899-12-31 06:20:00	NW	1.7	7.7	60
1899-12-31 06:21:00	NW	1.7	7.7	60
1899-12-31 06:22:00	NW	1.8	7.7	60
1899-12-31 06:23:00	NW	1.9	7.6	60
1899-12-31 06:24:00	NW	2.1	7.7	60
1899-12-31 06:25:00	NW	2.1	7.7	59
1899-12-31 06:26:00	NW	2.2	7.7	59
1899-12-31 06:27:00	NW	2.1	7.7	59
1899-12-31 06:28:00	NW	2.2	7.8	59
1899-12-31 06:29:00	NW	1.9	7.8	58
1899-12-31 06:30:00	WNW	1.5	7.8	58
1899-12-31 06:31:00	WNW	1.8	7.8	58
1899-12-31 06:32:00	WNW	1.2	7.8	57
1899-12-31 06:33:00	WNW	1.5	7.8	57
1899-12-31 06:34:00	WNW	2	7.9	57
1899-12-31 06:35:00	WNW	1.6	7.8	57
1899-12-31 06:36:00	WNW	1.6	7.9	56
1899-12-31 06:37:00	WNW	2.2	7.9	56
1899-12-31 06:38:00	WNW	1.8	7.9	56
1899-12-31 06:39:00	WNW	1.9	7.8	56
1899-12-31 06:40:00	WNW	2.1	7.8	56
1899-12-31 06:41:00	WNW	2	7.9	56
1899-12-31 06:42:00	WNW	1.3	7.8	56
1899-12-31 06:43:00	WNW	1.3	7.8	56
1899-12-31 06:44:00	C	0.4	7.7	56
1899-12-31 06:45:00	W	1.5	7.7	57
1899-12-31 06:46:00	WNW	1.1	7.6	57
1899-12-31 06:47:00	W	0.9	7.6	57
1899-12-31 06:48:00	W	1.8	7.7	57
1899-12-31 06:49:00	W	1.1	7.7	57
1899-12-31 06:50:00	WNW	0.9	7.7	56
1899-12-31 06:51:00	C	0	7.6	57
1899-12-31 06:52:00	C	0.2	7.6	57
1899-12-31 06:53:00	C	0	7.6	57
1899-12-31 06:54:00	C	0.1	7.6	57
1899-12-31 06:55:00	C	0.2	7.5	57
1899-12-31 06:56:00	WNW	0.9	7.5	57
1899-12-31 06:57:00	WNW	0.5	7.5	57
1899-12-31 06:58:00	C	0.1	7.6	56
1899-12-31 06:59:00	C	0	7.5	56
1899-12-31 07:00:00	C	0	7.5	56
1899-12-31 07:01:00	C	0	7.5	57
1899-12-31 07:02:00	C	0	7.5	57
1899-12-31 07:03:00	C	0	7.4	57
1899-12-31 07:04:00	C	0	7.5	57
1899-12-31 07:05:00	NW	0.5	7.5	57
1899-12-31 07:06:00	NW	0.9	7.4	57
1899-12-31 07:07:00	NW	0.5	7.5	57
1899-12-31 07:08:00	C	0.4	7.4	57
1899-12-31 07:09:00	NW	0.6	7.5	56
1899-12-31 07:10:00	NW	0.6	7.5	56
1899-12-31 07:11:00	NW	1.1	7.5	56
1899-12-31 07:12:00	NW	1.1	7.5	57
1899-12-31 07:13:00	NNW	1.1	7.4	57
1899-12-31 07:14:00	N	1.1	7.3	57
1899-12-31 07:15:00	N	1	7.1	58
1899-12-31 07:16:00	N	1.1	7	58
1899-12-31 07:17:00	N	0.6	6.9	58
1899-12-31 07:18:00	C	0	6.8	59
1899-12-31 07:19:00	SW	1.1	6.7	60
1899-12-31 07:20:00	S	1.9	6.7	60
1899-12-31 07:21:00	S	1.9	6.8	60
1899-12-31 07:22:00	S	1.5	6.8	60
1899-12-31 07:23:00	SSE	0.9	6.8	60
1899-12-31 07:24:00	S	1.2	6.9	60
1899-12-31 07:25:00	S	1.7	6.9	59
1899-12-31 07:26:00	SSW	2	6.9	60
1899-12-31 07:27:00	SSW	1.7	7.1	59
1899-12-31 07:28:00	SSW	1.4	7.2	59
1899-12-31 07:29:00	S	1.4	7.3	58
1899-12-31 07:30:00	SSE	1.3	7.4	58
1899-12-31 07:31:00	SSE	1.3	7.5	58
1899-12-31 07:32:00	SE	1	7.2	59
1899-12-31 07:33:00	ESE	1.2	6.7	60
1899-12-31 07:34:00	SE	1.7	6.3	62
1899-12-31 07:35:00	SE	1.9	6.2	63
1899-12-31 07:36:00	SSE	1.9	6.1	64
1899-12-31 07:37:00	SSE	2.1	6.2	65
1899-12-31 07:38:00	SSE	1.8	6.5	64
1899-12-31 07:39:00	SE	2.4	6.5	64
1899-12-31 07:40:00	SE	2.1	6.6	64
1899-12-31 07:41:00	SSE	1.8	6.6	64
1899-12-31 07:42:00	SSE	1.6	6.7	64
1899-12-31 07:43:00	SE	1.6	6.6	64
1899-12-31 07:44:00	SSE	1.3	6.6	64
1899-12-31 07:45:00	SSE	1.1	6.6	64
1899-12-31 07:46:00	S	1.2	6.7	64
1899-12-31 07:47:00	S	1.5	6.8	64
1899-12-31 07:48:00	S	1.6	7	63
1899-12-31 07:49:00	SSW	1.4	7.2	63
1899-12-31 07:50:00	SSW	1.1	7.4	61
1899-12-31 07:51:00	SSW	1.1	7.6	60
1899-12-31 07:52:00	SSW	1.1	7.8	60
1899-12-31 07:53:00	SSW	0.8	7.9	58
1899-12-31 07:54:00	SW	0.6	8	58
1899-12-31 07:55:00	SW	0.6	8	58
1899-12-31 07:56:00	SSW	0.7	8	58
1899-12-31 07:57:00	SSW	0.8	8.1	57
1899-12-31 07:58:00	C	0.1	8.1	58
1899-12-31 07:59:00	WSW	0.5	8.2	58
1899-12-31 08:00:00	WSW	1.1	8.2	57
1899-12-31 08:01:00	WSW	1	8.3	58
1899-12-31 08:02:00	WSW	1.3	8.3	57
1899-12-31 08:03:00	WSW	1.2	8.3	57
1899-12-31 08:04:00	WSW	1.1	8.4	56
1899-12-31 08:05:00	WSW	1.3	8.5	56
1899-12-31 08:06:00	WSW	1	8.6	56
1899-12-31 08:07:00	WSW	1.1	8.6	56
1899-12-31 08:08:00	WSW	1.2	8.7	54
1899-12-31 08:09:00	WSW	1.1	8.8	54
1899-12-31 08:10:00	WSW	1	8.8	54
1899-12-31 08:11:00	WSW	1.2	8.8	53
1899-12-31 08:12:00	WSW	1	8.9	53
1899-12-31 08:13:00	W	1.2	9	52
1899-12-31 08:14:00	WSW	1.1	9.1	52
1899-12-31 08:15:00	W	1.1	9.2	51
1899-12-31 08:16:00	W	0.9	9.2	51
1899-12-31 08:17:00	W	1.4	9.3	51
1899-12-31 08:18:00	W	1.5	9.3	49
1899-12-31 08:19:00	W	1.6	9.4	50
1899-12-31 08:20:00	W	1.3	9.5	50
1899-12-31 08:21:00	W	1.5	9.6	48
1899-12-31 08:22:00	W	1.9	9.6	48
1899-12-31 08:23:00	W	1.5	9.7	48
1899-12-31 08:24:00	WNW	1.4	9.7	48
1899-12-31 08:25:00	WNW	1.3	9.8	48
1899-12-31 08:26:00	W	1.5	9.8	48
1899-12-31 08:27:00	WNW	1.6	9.9	48
1899-12-31 08:28:00	WNW	1.5	9.9	47
1899-12-31 08:29:00	W	1.3	9.9	47
1899-12-31 08:30:00	W	1.5	9.9	47
1899-12-31 08:31:00	W	1.5	9.9	47
1899-12-31 08:32:00	WNW	1.5	9.9	47
1899-12-31 08:33:00	WNW	1.3	10	47
1899-12-31 08:34:00	WNW	1.3	10	47
1899-12-31 08:35:00	NW	1.8	10	47
1899-12-31 08:36:00	WNW	1.4	10	47
1899-12-31 08:37:00	WNW	2.2	10	46
1899-12-31 08:38:00	NW	1.8	10.1	47
1899-12-31 08:39:00	NNW	1.2	10.2	47
1899-12-31 08:40:00	NNW	2.6	10.3	47
1899-12-31 08:41:00	N	4.1	10.4	46
1899-12-31 08:42:00	N	4.7	10.5	45
1899-12-31 08:43:00	N	6.1	10.5	44
1899-12-31 08:44:00	N	4.7	10.4	44
1899-12-31 08:45:00	NNE	4.7	10.2	44
1899-12-31 08:46:00	NNE	4.8	10.1	44
1899-12-31 08:47:00	NNE	4.4	10	45
1899-12-31 08:48:00	NNE	4.5	9.9	44
1899-12-31 08:49:00	NNE	4.7	9.9	43
1899-12-31 08:50:00	N	3.7	9.7	42
1899-12-31 08:51:00	NNE	3.6	9.6	43
1899-12-31 08:52:00	NNE	4.4	9.6	42
1899-12-31 08:53:00	NNE	3.7	9.5	43
1899-12-31 08:54:00	NNE	3.3	9.3	43
1899-12-31 08:55:00	NNE	4.3	9.3	43
1899-12-31 08:56:00	NE	4	9.4	43
1899-12-31 08:57:00	NNE	4.7	9.5	43
1899-12-31 08:58:00	NNE	3.7	9.5	43
1899-12-31 08:59:00	NNE	3.4	9.4	43
1899-12-31 09:00:00	NNE	3.4	9.4	42
1899-12-31 09:01:00	NNE	3.1	9.5	43
1899-12-31 09:02:00	NNE	3.5	9.5	43
1899-12-31 09:03:00	NNE	3.9	9.5	42
1899-12-31 09:04:00	NNE	3.9	9.6	42
1899-12-31 09:05:00	NNE	3.8	9.6	43
1899-12-31 09:06:00	NNE	3.5	9.6	43
1899-12-31 09:07:00	NNE	2.8	9.8	43
1899-12-31 09:08:00	NNE	4.1	9.8	41
1899-12-31 09:09:00	N	3.2	9.7	42
1899-12-31 09:10:00	NNE	3.7	9.8	42
1899-12-31 09:11:00	NNE	3.3	9.8	42
1899-12-31 09:12:00	NNE	3.3	9.8	42
1899-12-31 09:13:00	NNE	3.7	9.9	42
1899-12-31 09:14:00	NNE	3.6	10	42
1899-12-31 09:15:00	NNE	4.4	10.1	42
1899-12-31 09:16:00	NNE	4.4	10.1	41
1899-12-31 09:17:00	NNE	4.3	10.1	41
1899-12-31 09:18:00	NNE	3.6	10	41
1899-12-31 09:19:00	NNE	4	10.2	42
1899-12-31 09:20:00	NNE	4	10.2	41
1899-12-31 09:21:00	NNE	4.2	10.2	41
1899-12-31 09:22:00	N	4.5	10.2	40
1899-12-31 09:23:00	N	4.1	10.3	41
1899-12-31 09:24:00	NNE	5	10.4	41
1899-12-31 09:25:00	NNE	4.4	10.4	41
1899-12-31 09:26:00	NNE	4.5	10.5	41
1899-12-31 09:27:00	NNE	4.7	10.5	40
1899-12-31 09:28:00	NNE	4.1	10.5	40
1899-12-31 09:29:00	NNE	4.2	10.5	40
1899-12-31 09:30:00	NNE	5.6	10.6	40
1899-12-31 09:31:00	NNE	5.3	10.6	40
1899-12-31 09:32:00	NNE	4.9	10.6	41
1899-12-31 09:33:00	NE	5.5	10.6	41
1899-12-31 09:34:00	NE	5.3	10.5	41
1899-12-31 09:35:00	NE	4.8	10.4	42
1899-12-31 09:36:00	NE	5	10.3	42
1899-12-31 09:37:00	NE	5.1	10.3	42
1899-12-31 09:38:00	NE	5.2	10.2	42
1899-12-31 09:39:00	NNE	3	9.9	43
1899-12-31 09:40:00	NNE	4	9.9	43
1899-12-31 09:41:00	NE	4.3	9.9	43
1899-12-31 09:42:00	NNE	3.8	9.9	43
1899-12-31 09:43:00	NE	3.7	9.9	43
1899-12-31 09:44:00	NE	2.7	9.9	44
1899-12-31 09:45:00	ENE	4.3	9.9	43
1899-12-31 09:46:00	NE	4.4	10	44
1899-12-31 09:47:00	NNE	3.9	10	43
1899-12-31 09:48:00	NE	4.3	10	43
1899-12-31 09:49:00	NNE	3.3	9.9	44
1899-12-31 09:50:00	NE	4	9.8	44
1899-12-31 09:51:00	NNE	3.2	9.8	44
1899-12-31 09:52:00	NNE	3.7	9.9	44
1899-12-31 09:53:00	NE	3.6	10	45
1899-12-31 09:54:00	ENE	3.6	10.1	44
1899-12-31 09:55:00	NE	3.3	10.1	44
1899-12-31 09:56:00	NE	3.6	10.1	44
1899-12-31 09:57:00	NE	3	10	44
1899-12-31 09:58:00	NE	3.2	10.1	45
1899-12-31 09:59:00	NE	4.1	10.1	44
1899-12-31 10:00:00	NNE	3.4	10.1	44
1899-12-31 10:01:00	NE	4.3	10.1	44
1899-12-31 10:02:00	NNE	3.7	10.1	45
1899-12-31 10:03:00	NNE	4.4	10.2	45
1899-12-31 10:04:00	NNE	4.9	10.3	45
1899-12-31 10:05:00	NE	4.9	10.3	44
1899-12-31 10:06:00	NNE	4.4	10.3	44
1899-12-31 10:07:00	NE	4.1	10.3	45
1899-12-31 10:08:00	NE	4	10.3	45
1899-12-31 10:09:00	NE	4.2	10.3	45
1899-12-31 10:10:00	NNE	5.4	10.4	45
1899-12-31 10:11:00	NE	6.2	10.4	45
1899-12-31 10:12:00	NE	5	10.4	46
1899-12-31 10:13:00	NE	5.8	10.4	46
1899-12-31 10:14:00	NE	5.5	10.4	46
1899-12-31 10:15:00	NE	5	10.4	47
1899-12-31 10:16:00	NNE	4.9	10.4	47
1899-12-31 10:17:00	NNE	5.1	10.4	47
1899-12-31 10:18:00	NE	5.5	10.5	47
1899-12-31 10:19:00	NNE	5.5	10.5	48
1899-12-31 10:20:00	NE	4.9	10.6	47
1899-12-31 10:21:00	NE	5	10.5	47
1899-12-31 10:22:00	NE	4.9	10.5	48
1899-12-31 10:23:00	NE	4.4	10.5	48
1899-12-31 10:24:00	NE	3.6	10.6	49
1899-12-31 10:25:00	NNE	3.7	10.6	48
1899-12-31 10:26:00	NE	4.1	10.6	48
1899-12-31 10:27:00	NE	3.7	10.5	48
1899-12-31 10:28:00	NE	3.6	10.6	48
1899-12-31 10:29:00	ENE	3.2	10.7	49
1899-12-31 10:30:00	ENE	3.6	10.8	49
1899-12-31 10:31:00	NE	3.7	10.8	50
1899-12-31 10:32:00	ENE	3.5	10.7	51
1899-12-31 10:33:00	NE	3.1	10.7	52
1899-12-31 10:34:00	NE	4	10.8	52
1899-12-31 10:35:00	ENE	4.4	10.8	52
1899-12-31 10:36:00	ENE	3.7	10.8	52
1899-12-31 10:37:00	ENE	3.6	10.7	52
1899-12-31 10:38:00	NE	2.4	10.6	51
1899-12-31 10:39:00	ENE	2.6	10.6	52
1899-12-31 10:40:00	ENE	1.5	10.6	52
1899-12-31 10:41:00	ENE	3.2	10.6	52
1899-12-31 10:42:00	E	1.1	10.6	53
1899-12-31 10:43:00	E	3.3	10.7	53
1899-12-31 10:44:00	E	3	10.8	53
1899-12-31 10:45:00	ENE	2.8	10.9	54
1899-12-31 10:46:00	ENE	2.4	10.8	54
1899-12-31 10:47:00	E	2.3	10.7	55
1899-12-31 10:48:00	E	3	10.7	55
1899-12-31 10:49:00	E	2.6	10.8	56
1899-12-31 10:50:00	ENE	3.8	11	55
1899-12-31 10:51:00	ENE	3.8	11	54
1899-12-31 10:52:00	ENE	4	11.1	53
1899-12-31 10:53:00	ENE	4.2	11.1	53
1899-12-31 10:54:00	ENE	3.8	11	53
1899-12-31 10:55:00	ENE	3.5	11	53
1899-12-31 10:56:00	ENE	2.7	11	53
1899-12-31 10:57:00	E	3.5	10.9	53
1899-12-31 10:58:00	ENE	2.9	10.9	53
1899-12-31 10:59:00	ENE	4	10.5	53
1899-12-31 11:00:00	ENE	4.3	10.2	53
1899-12-31 11:01:00	ENE	3.3	11	53
1899-12-31 11:02:00	ENE	3.1	10.9	53
1899-12-31 11:03:00	ENE	3.5	10.6	53
1899-12-31 11:04:00	ENE	3.4	10.9	54
1899-12-31 11:05:00	ENE	3.8	11	53
1899-12-31 11:06:00	ENE	3.2	10.6	54
1899-12-31 11:07:00	ENE	4.2	11	55
1899-12-31 11:08:00	E	4.7	10.9	55
1899-12-31 11:09:00	E	4.4	10.8	55
1899-12-31 11:10:00	ENE	3.5	10.8	56
1899-12-31 11:11:00	E	4.3	10.7	56
1899-12-31 11:12:00	E	5	10.7	57
1899-12-31 11:13:00	ENE	3.4	10.5	57
1899-12-31 11:14:00	ENE	2.4	10.6	57
1899-12-31 11:15:00	ENE	3.7	10.8	57
1899-12-31 11:16:00	ENE	3.6	10.7	56
1899-12-31 11:17:00	ENE	3.7	10.7	57
1899-12-31 11:18:00	ENE	4.2	10.7	57
1899-12-31 11:19:00	NE	3	10.7	56
1899-12-31 11:20:00	ENE	4.1	10.7	56
1899-12-31 11:21:00	ENE	2.4	10.2	57
1899-12-31 11:22:00	ENE	2.5	10.6	56
1899-12-31 11:23:00	ENE	3.6	9.9	56
1899-12-31 11:24:00	ENE	3.5	9	56
1899-12-31 11:25:00	ENE	3.2	9.5	56
1899-12-31 11:26:00	ENE	3.9	9.5	56
1899-12-31 11:27:00	ENE	3.2	9.5	56
1899-12-31 11:28:00	ENE	3.4	9.5	56
1899-12-31 11:29:00	ENE	3.5	9.3	57
1899-12-31 11:30:00	E	3.2	10.6	57
1899-12-31 11:31:00	E	3.1	10.5	56
1899-12-31 11:32:00	ESE	4	10.2	55
1899-12-31 11:33:00	E	4.1	9.2	56
1899-12-31 11:34:00	ENE	4.1	9.2	55
1899-12-31 11:35:00	ENE	4.2	9.6	55
1899-12-31 11:36:00	ENE	4	9.2	55
1899-12-31 11:37:00	E	4.4	9.9	55
1899-12-31 11:38:00	ENE	4.1	9.7	55
1899-12-31 11:39:00	ENE	4.3	9.7	55
1899-12-31 11:40:00	E	3.4	9.2	55
1899-12-31 11:41:00	ENE	3.1	10.9	56
1899-12-31 11:42:00	ENE	3.6	11.2	54
1899-12-31 11:43:00	ENE	3.4	11.3	54
1899-12-31 11:44:00	E	4.8	11.2	54
1899-12-31 11:45:00	E	4.7	9.8	54
1899-12-31 11:46:00	ENE	5.4	10	54
1899-12-31 11:47:00	ENE	4.4	9.7	55
1899-12-31 11:48:00	E	3.7	10	56
1899-12-31 11:49:00	E	5.1	9.7	56
1899-12-31 11:50:00	ENE	5.2	9.1	56
1899-12-31 11:51:00	E	4.7	8.5	56
1899-12-31 11:52:00	E	4.4	10.5	56
1899-12-31 11:53:00	E	3.5	10.3	56
1899-12-31 11:54:00	ENE	3.5	10.4	57
1899-12-31 11:55:00	ENE	3.1	10.3	57
1899-12-31 11:56:00	ENE	3.5	10.4	57
1899-12-31 11:57:00	ESE	4.1	10.6	56
1899-12-31 11:58:00	ESE	4.3	10.7	55
1899-12-31 11:59:00	ESE	4.4	10.7	56
1899-12-31 12:00:00	E	3.1	10.6	56
1899-12-31 12:01:00	ENE	3.4	10.9	55
1899-12-31 12:02:00	ENE	4.6	11.1	54
1899-12-31 12:03:00	ENE	3.4	11.1	54
1899-12-31 12:04:00	ENE	4.4	10.9	54
1899-12-31 12:05:00	ENE	3.1	11.1	54
1899-12-31 12:06:00	E	4	11	54
1899-12-31 12:07:00	ENE	3.5	11.1	54
1899-12-31 12:08:00	E	4.7	11.1	54
1899-12-31 12:09:00	E	5.2	9.3	53
1899-12-31 12:10:00	E	4.9	10.4	54
1899-12-31 12:11:00	E	3.7	10.4	54
1899-12-31 12:12:00	E	4.4	10.4	55
1899-12-31 12:13:00	E	4.5	10.8	54
1899-12-31 12:14:00	E	4.4	10.8	55
1899-12-31 12:15:00	E	5.2	10.9	54
1899-12-31 12:16:00	ENE	4.3	10.8	54
1899-12-31 12:17:00	ENE	4.5	11	54
1899-12-31 12:18:00	ENE	4.2	11	54
1899-12-31 12:19:00	ENE	2.4	9.8	54
1899-12-31 12:20:00	ENE	2.2	10.3	55
1899-12-31 12:21:00	ENE	2.5	11.1	55
1899-12-31 12:22:00	ENE	4.4	9.7	53
1899-12-31 12:23:00	ENE	3.7	9.6	54
1899-12-31 12:24:00	E	3.9	11.3	54
1899-12-31 12:25:00	E	3.6	11.3	53
1899-12-31 12:26:00	ESE	3.7	11.3	52
1899-12-31 12:27:00	E	3.7	11.1	52
1899-12-31 12:28:00	ESE	2.8	11.4	53
1899-12-31 12:29:00	ENE	2.7	11.5	53
1899-12-31 12:30:00	E	2.9	11.3	53
1899-12-31 12:31:00	E	3	11.1	52
1899-12-31 12:32:00	E	2.9	11.1	53
1899-12-31 12:33:00	ESE	3.8	11.2	53
1899-12-31 12:34:00	ESE	3.9	11.5	54
1899-12-31 12:35:00	E	4.3	11.6	53
1899-12-31 12:36:00	ESE	4.1	11.4	53
1899-12-31 12:37:00	ESE	2.9	11.4	54
1899-12-31 12:38:00	ENE	5.2	11.4	54
1899-12-31 12:39:00	E	5.2	11.2	53
1899-12-31 12:40:00	ENE	4.3	10.8	54
1899-12-31 12:41:00	ENE	4.7	11.1	55
1899-12-31 12:42:00	E	5.7	11.2	55
1899-12-31 12:43:00	E	4.9	11.1	54
1899-12-31 12:44:00	E	4.8	11.2	54
1899-12-31 12:45:00	E	4.6	10.5	54
1899-12-31 12:46:00	E	3.4	11.1	54
1899-12-31 12:47:00	ENE	4.2	10.9	53
1899-12-31 12:48:00	E	3.2	10.4	54
1899-12-31 12:49:00	ESE	3.7	10	53
1899-12-31 12:50:00	ESE	4.2	9.9	53
1899-12-31 12:51:00	SE	3.7	11.1	53
1899-12-31 12:52:00	ESE	4.1	10.7	53
1899-12-31 12:53:00	ESE	4.4	10.5	52
1899-12-31 12:54:00	SE	4.5	9.2	53
1899-12-31 12:55:00	ESE	5.3	9.8	53
1899-12-31 12:56:00	ESE	5.4	9.8	52
1899-12-31 12:57:00	SE	4	10.6	53
1899-12-31 12:58:00	ESE	5.2	9.9	52
1899-12-31 12:59:00	ESE	5.3	8.2	52
1899-12-31 13:00:00	ESE	4.6	10.4	52
1899-12-31 13:01:00	E	4.1	11.5	52
1899-12-31 13:02:00	ESE	3.9	11.5	52
1899-12-31 13:03:00	ESE	4.4	11.6	51
1899-12-31 13:04:00	ESE	2.8	11.1	51
1899-12-31 13:05:00	SSE	1.8	10.8	52
1899-12-31 13:06:00	SE	2.4	11.3	51
1899-12-31 13:07:00	E	3.1	11.2	50
1899-12-31 13:08:00	ESE	2.6	11.1	51
1899-12-31 13:09:00	ESE	2.1	11	52
1899-12-31 13:10:00	E	2.7	11.1	51
1899-12-31 13:11:00	SE	3.3	11.6	51
1899-12-31 13:12:00	SE	4.1	11.7	51
1899-12-31 13:13:00	SE	4.9	11.8	50
1899-12-31 13:14:00	SE	4.4	11.6	50
1899-12-31 13:15:00	SE	3.8	11.6	51
1899-12-31 13:16:00	ESE	4.7	11.1	50
1899-12-31 13:17:00	SE	4.1	10.4	50
1899-12-31 13:18:00	SSE	3.9	10.2	51
1899-12-31 13:19:00	SE	5.8	10.9	51
1899-12-31 13:20:00	SE	3.8	9.9	52
1899-12-31 13:21:00	ESE	4.6	11.5	51
1899-12-31 13:22:00	ESE	3.8	11.7	51
1899-12-31 13:23:00	E	3.4	11.3	50
1899-12-31 13:24:00	E	2.7	11.5	50
1899-12-31 13:25:00	ESE	2.5	11.8	52
1899-12-31 13:26:00	SE	3.9	11.9	50
1899-12-31 13:27:00	ESE	3.8	11.8	49
1899-12-31 13:28:00	E	3.7	11.8	49
1899-12-31 13:29:00	E	2.6	11.5	49
1899-12-31 13:30:00	E	2.3	11.5	50
1899-12-31 13:31:00	ESE	4.4	11.7	51
1899-12-31 13:32:00	E	4.2	11.8	50
1899-12-31 13:33:00	ESE	3	11.5	50
1899-12-31 13:34:00	E	2.8	11.6	51
1899-12-31 13:35:00	E	3.1	11.9	50
1899-12-31 13:36:00	E	4.6	12	49
1899-12-31 13:37:00	E	3.7	11.8	49
1899-12-31 13:38:00	E	3.4	11.7	50
1899-12-31 13:39:00	E	3.2	11.8	51
1899-12-31 13:40:00	E	4.4	12	51
1899-12-31 13:41:00	ESE	4.2	12.2	50
1899-12-31 13:42:00	ESE	4.8	12.2	50
1899-12-31 13:43:00	ESE	4.8	12.1	50
1899-12-31 13:44:00	ESE	4	12	51
1899-12-31 13:45:00	ESE	3.4	11.6	51
1899-12-31 13:46:00	ESE	3.3	11.6	52
1899-12-31 13:47:00	ESE	3.6	11.5	52
1899-12-31 13:48:00	ESE	3.6	11.5	52
1899-12-31 13:49:00	ESE	3.4	11.4	52
1899-12-31 13:50:00	SE	2.1	11.4	53
1899-12-31 13:51:00	E	2.7	11.5	52
1899-12-31 13:52:00	E	2.5	11.5	52
1899-12-31 13:53:00	SE	2.2	10.1	52
1899-12-31 13:54:00	SE	2.8	11.4	51
1899-12-31 13:55:00	ESE	3.6	11.5	51
1899-12-31 13:56:00	ESE	3.5	10.1	51
1899-12-31 13:57:00	ESE	3.2	11.7	50
1899-12-31 13:58:00	ESE	2.1	11.6	51
1899-12-31 13:59:00	E	2.9	11.6	51
1899-12-31 14:00:00	E	3.4	11.6	50
1899-12-31 14:01:00	E	3.4	11.5	50
1899-12-31 14:02:00	E	2.3	11.5	51
1899-12-31 14:03:00	ESE	2.9	11.6	50
1899-12-31 14:04:00	ESE	3.4	11.7	51
1899-12-31 14:05:00	E	4.1	11.8	50
1899-12-31 14:06:00	ENE	3.3	11.7	50
1899-12-31 14:07:00	E	3	11.8	51
1899-12-31 14:08:00	E	3	11.9	51
1899-12-31 14:09:00	ESE	4.1	11.9	50
1899-12-31 14:10:00	ESE	3.8	12.1	51
1899-12-31 14:11:00	E	3.4	12.2	50
1899-12-31 14:12:00	E	4.6	12.2	49
1899-12-31 14:13:00	ESE	3.8	12	49
1899-12-31 14:14:00	SE	2.7	11.7	50
1899-12-31 14:15:00	ESE	2.2	11.6	51
1899-12-31 14:16:00	E	3	11.9	50
1899-12-31 14:17:00	ESE	2.8	11.7	50
1899-12-31 14:18:00	ESE	2.6	11.8	50
1899-12-31 14:19:00	ENE	2.9	11.8	49
1899-12-31 14:20:00	ENE	2	11.8	49
1899-12-31 14:21:00	E	2.4	11.7	49
1899-12-31 14:22:00	ESE	1.7	11.6	49
1899-12-31 14:23:00	ESE	1.5	11.7	50
1899-12-31 14:24:00	ESE	2.5	11.8	49
1899-12-31 14:25:00	ESE	2.6	12.1	49
1899-12-31 14:26:00	ESE	2.9	12.1	49
1899-12-31 14:27:00	ESE	3.3	12.2	49
1899-12-31 14:28:00	E	4.1	12.1	49
1899-12-31 14:29:00	E	4.1	12.2	49
1899-12-31 14:30:00	E	3.7	12.1	49
1899-12-31 14:31:00	E	3.3	12	49
1899-12-31 14:32:00	E	4.3	12.1	49
1899-12-31 14:33:00	ESE	4.1	12.1	49
1899-12-31 14:34:00	ESE	2.9	12.1	50
1899-12-31 14:35:00	ESE	3.3	12	50
1899-12-31 14:36:00	ESE	4.8	12	49
1899-12-31 14:37:00	ESE	4.1	11.9	49
1899-12-31 14:38:00	ESE	3.9	12.1	49
1899-12-31 14:39:00	ESE	3.6	12.1	49
1899-12-31 14:40:00	ESE	4.1	12.1	49
1899-12-31 14:41:00	E	4.3	12.2	49
1899-12-31 14:42:00	E	3.9	12.1	49
1899-12-31 14:43:00	E	3.2	12.1	49
1899-12-31 14:44:00	E	3.6	12	49
1899-12-31 14:45:00	E	2.3	12.2	49
1899-12-31 14:46:00	E	2.7	12	48
1899-12-31 14:47:00	ESE	2.7	11.9	49
1899-12-31 14:48:00	ESE	2.4	11.8	49
1899-12-31 14:49:00	SE	2	12	49
1899-12-31 14:50:00	E	2.4	12.1	49
1899-12-31 14:51:00	SE	3.3	12.1	48
1899-12-31 14:52:00	ESE	3.4	12.3	49
1899-12-31 14:53:00	ESE	3.4	12.2	47
1899-12-31 14:54:00	ESE	3.6	12.1	48
1899-12-31 14:55:00	ESE	3.8	11.9	48
1899-12-31 14:56:00	SE	2.3	11.9	49
1899-12-31 14:57:00	ESE	4	12	49
1899-12-31 14:58:00	ESE	4.3	12	48
1899-12-31 14:59:00	SE	3.7	11.9	48
1899-12-31 15:00:00	SE	4.2	11.9	48
1899-12-31 15:01:00	SE	3.3	11.8	49
1899-12-31 15:02:00	ESE	3.6	11.8	49
1899-12-31 15:03:00	E	3.2	11.7	49
1899-12-31 15:04:00	ENE	4	11.7	49
1899-12-31 15:05:00	ESE	2.7	11.7	49
1899-12-31 15:06:00	ESE	4.2	11.8	49
1899-12-31 15:07:00	E	3.5	11.9	49
1899-12-31 15:08:00	E	3.6	11.9	49
1899-12-31 15:09:00	E	3.9	11.9	49
1899-12-31 15:10:00	ESE	3.8	12	49
1899-12-31 15:11:00	E	3.6	12	49
1899-12-31 15:12:00	E	4.5	12	49
1899-12-31 15:13:00	E	4.3	12.1	49
1899-12-31 15:14:00	E	4.3	12	49
1899-12-31 15:15:00	E	3.5	11.8	49
1899-12-31 15:16:00	E	4	11.8	49
1899-12-31 15:17:00	ESE	3.7	11.8	50
1899-12-31 15:18:00	E	4.5	11.9	49
1899-12-31 15:19:00	E	3.8	11.8	49
1899-12-31 15:20:00	E	3.9	11.8	49
1899-12-31 15:21:00	ENE	3.6	11.7	50
1899-12-31 15:22:00	E	3.8	11.7	49
1899-12-31 15:23:00	E	3.8	11.8	49
1899-12-31 15:24:00	E	3.1	11.8	49
1899-12-31 15:25:00	E	3.8	11.8	49
1899-12-31 15:26:00	ESE	4.7	11.8	49
1899-12-31 15:27:00	ESE	4.5	11.8	50
1899-12-31 15:28:00	ESE	5.1	11.9	50
1899-12-31 15:29:00	E	4.5	12	51
1899-12-31 15:30:00	ESE	4.2	11.8	50
1899-12-31 15:31:00	ESE	4.9	11.8	50
1899-12-31 15:32:00	E	4.8	11.8	50
1899-12-31 15:33:00	E	4.2	11.8	51
1899-12-31 15:34:00	E	4.6	11.7	51
1899-12-31 15:35:00	E	4	11.6	51
1899-12-31 15:36:00	E	3.6	11.5	52
1899-12-31 15:37:00	ESE	3.8	11.5	52
1899-12-31 15:38:00	E	5.2	11.5	52
1899-12-31 15:39:00	ESE	5.4	11.6	52
1899-12-31 15:40:00	ESE	4.6	11.5	52
1899-12-31 15:41:00	ESE	4.1	11.4	53
1899-12-31 15:42:00	ESE	3.9	11.4	53
1899-12-31 15:43:00	E	4.8	11.4	53
1899-12-31 15:44:00	ESE	4.3	11.4	53
1899-12-31 15:45:00	ESE	4.8	11.3	53
1899-12-31 15:46:00	ESE	4.4	11.3	53
1899-12-31 15:47:00	ESE	5.4	11.4	54
1899-12-31 15:48:00	ESE	5.2	11.4	54
1899-12-31 15:49:00	ESE	5.3	11.4	53
1899-12-31 15:50:00	ESE	5.3	11.4	53
1899-12-31 15:51:00	ESE	5.2	11.3	53
1899-12-31 15:52:00	ESE	5.4	11.3	54
1899-12-31 15:53:00	E	5.9	11.3	54
1899-12-31 15:54:00	E	5.5	11.1	54
1899-12-31 15:55:00	E	5	11	55
1899-12-31 15:56:00	E	4.7	10.9	55
1899-12-31 15:57:00	E	4.6	10.9	55
1899-12-31 15:58:00	E	5.3	10.8	55
1899-12-31 15:59:00	ESE	5.2	10.7	55
1899-12-31 16:00:00	E	5.8	10.7	56
1899-12-31 16:01:00	ESE	5.2	10.6	56
1899-12-31 16:02:00	ESE	4.7	10.5	56
1899-12-31 16:03:00	E	4.7	10.4	56
1899-12-31 16:04:00	E	5.1	10.4	57
1899-12-31 16:05:00	ESE	5.2	10.3	57
1899-12-31 16:06:00	E	5	10.3	57
1899-12-31 16:07:00	ESE	4.8	10.2	57
1899-12-31 16:08:00	ESE	5	10.2	58
1899-12-31 16:09:00	ESE	6	10.2	58
1899-12-31 16:10:00	ESE	5	10.1	58
1899-12-31 16:11:00	E	4.9	10	58
1899-12-31 16:12:00	E	5.3	10	58
1899-12-31 16:13:00	E	5.5	9.9	59
1899-12-31 16:14:00	ESE	5.4	9.9	59
1899-12-31 16:15:00	E	5.5	9.9	59
1899-12-31 16:16:00	ESE	4.5	9.8	59
1899-12-31 16:17:00	E	5	9.8	60
1899-12-31 16:18:00	E	4.4	9.8	60
1899-12-31 16:19:00	E	4.7	9.8	60
1899-12-31 16:20:00	E	4.7	9.7	60
1899-12-31 16:21:00	E	4.6	9.7	60
1899-12-31 16:22:00	E	5.1	9.7	60
1899-12-31 16:23:00	E	4.9	9.6	60
1899-12-31 16:24:00	E	4.2	9.6	61
1899-12-31 16:25:00	E	4.4	9.6	61
1899-12-31 16:26:00	E	5.1	9.5	61
1899-12-31 16:27:00	E	4.6	9.6	61
1899-12-31 16:28:00	ESE	6.2	9.5	61
1899-12-31 16:29:00	E	6.2	9.4	61
1899-12-31 16:30:00	E	5	9.3	62
1899-12-31 16:31:00	E	4.7	9.2	62
1899-12-31 16:32:00	E	4.6	9.2	63
1899-12-31 16:33:00	ESE	4.6	9.2	63
1899-12-31 16:34:00	ENE	3.5	9.2	63
1899-12-31 16:35:00	E	4.7	9.2	63
1899-12-31 16:36:00	E	4.8	9.1	64
1899-12-31 16:37:00	ENE	4.6	9.1	64
1899-12-31 16:38:00	E	5.3	9	64
1899-12-31 16:39:00	E	5.2	8.9	65
1899-12-31 16:40:00	E	4.2	8.9	65
1899-12-31 16:41:00	E	3.6	8.8	66
1899-12-31 16:42:00	ENE	5.2	8.8	66
1899-12-31 16:43:00	E	5.9	8.8	66
1899-12-31 16:44:00	E	5.7	8.8	66
1899-12-31 16:45:00	E	5.3	8.8	66
1899-12-31 16:46:00	E	5.5	8.7	66
1899-12-31 16:47:00	E	5.6	8.7	67
1899-12-31 16:48:00	E	5.4	8.7	67
1899-12-31 16:49:00	E	4.6	8.7	67
1899-12-31 16:50:00	ENE	4.7	8.6	67
1899-12-31 16:51:00	E	4.8	8.6	67
1899-12-31 16:52:00	ENE	5.7	8.5	67
1899-12-31 16:53:00	E	5.7	8.5	67
1899-12-31 16:54:00	ENE	5.3	8.4	67
1899-12-31 16:55:00	ENE	4.3	8.4	67
1899-12-31 16:56:00	ENE	4.3	8.4	67
1899-12-31 16:57:00	ENE	5.6	8.4	67
1899-12-31 16:58:00	E	4.6	8.4	67
1899-12-31 16:59:00	E	4.5	8.3	67
1899-12-31 17:00:00	E	6.2	8.3	67
1899-12-31 17:01:00	E	6.7	8.2	67
1899-12-31 17:02:00	ENE	5.3	8.2	67
1899-12-31 17:03:00	ENE	4.9	8.2	67
1899-12-31 17:04:00	ENE	4.4	8.3	67
1899-12-31 17:05:00	ENE	4.8	8.2	66
1899-12-31 17:06:00	E	5.2	8.2	66
1899-12-31 17:07:00	ENE	6.3	8.2	66
1899-12-31 17:08:00	E	5.6	8.1	67
1899-12-31 17:09:00	E	5.1	8.1	67
1899-12-31 17:10:00	ENE	5.7	8.1	67
1899-12-31 17:11:00	ENE	6	8	67
1899-12-31 17:12:00	E	4.5	8	67
1899-12-31 17:13:00	E	6	7.9	67
1899-12-31 17:14:00	ENE	6.7	7.9	67
1899-12-31 17:15:00	E	5.2	7.9	67
1899-12-31 17:16:00	E	4.2	7.8	67
1899-12-31 17:17:00	E	4.3	7.8	67
1899-12-31 17:18:00	E	5	7.8	67
1899-12-31 17:19:00	E	5.1	7.8	67
1899-12-31 17:20:00	ENE	5	7.8	67
1899-12-31 17:21:00	E	4.4	7.8	67
1899-12-31 17:22:00	ENE	4.4	7.9	67
1899-12-31 17:23:00	E	4	7.9	67
1899-12-31 17:24:00	ENE	4.6	7.8	66
1899-12-31 17:25:00	ENE	5.8	7.8	66
1899-12-31 17:26:00	ENE	5.4	7.8	66
1899-12-31 17:27:00	E	4.5	7.8	66
1899-12-31 17:28:00	ENE	4.8	7.8	66
1899-12-31 17:29:00	E	4.5	7.8	67
1899-12-31 17:30:00	E	5.2	7.8	66
1899-12-31 17:31:00	ENE	3	7.8	66
1899-12-31 17:32:00	ENE	3.3	7.9	67
1899-12-31 17:33:00	ENE	3.8	7.9	66
1899-12-31 17:34:00	E	4.4	7.8	66
1899-12-31 17:35:00	ENE	4.7	7.9	66
1899-12-31 17:36:00	ENE	4.2	7.8	66
1899-12-31 17:37:00	E	4.7	7.8	66
1899-12-31 17:38:00	E	5.8	7.8	66
1899-12-31 17:39:00	ENE	4.6	7.8	66
1899-12-31 17:40:00	E	5.1	7.8	66
1899-12-31 17:41:00	E	4.5	7.7	66
1899-12-31 17:42:00	ENE	3.6	7.7	66
1899-12-31 17:43:00	ENE	5	7.8	66
1899-12-31 17:44:00	E	4.6	7.8	65
1899-12-31 17:45:00	ENE	3.8	7.8	65
1899-12-31 17:46:00	ENE	3.2	7.8	65
1899-12-31 17:47:00	ENE	3.6	7.8	65
1899-12-31 17:48:00	E	4.3	7.8	65
1899-12-31 17:49:00	E	4.9	7.8	65
1899-12-31 17:50:00	E	3.7	7.8	65
1899-12-31 17:51:00	E	4.6	7.8	65
1899-12-31 17:52:00	E	4.2	7.7	65
1899-12-31 17:53:00	ENE	5.3	7.7	65
1899-12-31 17:54:00	E	4.8	7.6	65
1899-12-31 17:55:00	E	4.4	7.6	65
1899-12-31 17:56:00	ENE	3.9	7.7	65
1899-12-31 17:57:00	E	3.4	7.7	65
1899-12-31 17:58:00	E	4.1	7.7	65
1899-12-31 17:59:00	E	4.8	7.7	65
1899-12-31 18:00:00	E	4.4	7.6	65
1899-12-31 18:01:00	E	4.1	7.6	65
1899-12-31 18:02:00	E	4.4	7.6	65
1899-12-31 18:03:00	ENE	3.8	7.6	65
1899-12-31 18:04:00	ENE	4	7.7	65
1899-12-31 18:05:00	E	3	7.6	65
1899-12-31 18:06:00	ENE	4.5	7.6	64
1899-12-31 18:07:00	E	4.5	7.6	65
1899-12-31 18:08:00	E	4.7	7.5	64
1899-12-31 18:09:00	E	4.9	7.6	65
1899-12-31 18:10:00	ENE	4.5	7.6	64
1899-12-31 18:11:00	ENE	4.3	7.6	64
1899-12-31 18:12:00	E	3.6	7.6	64
1899-12-31 18:13:00	E	3.5	7.5	64
1899-12-31 18:14:00	E	4.1	7.5	64
1899-12-31 18:15:00	E	4.3	7.6	64
1899-12-31 18:16:00	ENE	4.3	7.6	64
1899-12-31 18:17:00	ENE	3.4	7.6	64
1899-12-31 18:18:00	E	4.7	7.6	63
1899-12-31 18:19:00	ENE	3.7	7.5	63
1899-12-31 18:20:00	ENE	3.5	7.6	63
1899-12-31 18:21:00	ENE	4.6	7.6	63
1899-12-31 18:22:00	E	3.9	7.6	63
1899-12-31 18:23:00	E	3.4	7.6	63
1899-12-31 18:24:00	E	4.1	7.6	63
1899-12-31 18:25:00	E	4.5	7.5	63
1899-12-31 18:26:00	ENE	4	7.5	63
1899-12-31 18:27:00	E	4	7.5	63
1899-12-31 18:28:00	E	5.2	7.6	62
1899-12-31 18:29:00	ENE	4.5	7.5	62
1899-12-31 18:30:00	E	3.6	7.6	62
1899-12-31 18:31:00	E	4.2	7.6	62
1899-12-31 18:32:00	E	4.2	7.6	62
1899-12-31 18:33:00	E	4.7	7.6	62
1899-12-31 18:34:00	E	4.5	7.6	61
1899-12-31 18:35:00	ENE	3.3	7.7	62
1899-12-31 18:36:00	E	3.8	7.7	61
1899-12-31 18:37:00	ENE	4	7.6	61
1899-12-31 18:38:00	ENE	4	7.6	61
1899-12-31 18:39:00	ENE	3.9	7.7	61
1899-12-31 18:40:00	ENE	2.9	7.7	61
1899-12-31 18:41:00	ENE	3.5	7.7	61
1899-12-31 18:42:00	E	4.9	7.7	60
1899-12-31 18:43:00	E	4.9	7.6	61
1899-12-31 18:44:00	E	4.6	7.6	61
1899-12-31 18:45:00	E	3.7	7.6	61
1899-12-31 18:46:00	ENE	4.5	7.6	61
1899-12-31 18:47:00	E	5.2	7.6	61
1899-12-31 18:48:00	E	5	7.6	61
1899-12-31 18:49:00	ENE	4.8	7.6	61
1899-12-31 18:50:00	ENE	3.2	7.7	60
1899-12-31 18:51:00	ENE	3.4	7.6	60
1899-12-31 18:52:00	ENE	3.8	7.7	60
1899-12-31 18:53:00	ENE	2.8	7.8	60
1899-12-31 18:54:00	E	3.3	7.8	60
1899-12-31 18:55:00	E	3.8	7.8	60
1899-12-31 18:56:00	ENE	4.1	7.8	59
1899-12-31 18:57:00	ENE	4	7.7	60
1899-12-31 18:58:00	ENE	3.5	7.7	60
1899-12-31 18:59:00	ENE	3.8	7.7	60
1899-12-31 19:00:00	ENE	2.8	7.8	60
1899-12-31 19:01:00	ENE	3.5	7.8	59
1899-12-31 19:02:00	ENE	5.6	7.8	59
1899-12-31 19:03:00	ENE	5	7.8	59
1899-12-31 19:04:00	ENE	4.2	7.8	59
1899-12-31 19:05:00	ENE	5.4	7.7	59
1899-12-31 19:06:00	ENE	5.3	7.7	59
1899-12-31 19:07:00	E	4.3	7.7	59
1899-12-31 19:08:00	E	4.1	7.7	59
1899-12-31 19:09:00	E	4.3	7.7	60
1899-12-31 19:10:00	ENE	2.8	7.6	60
1899-12-31 19:11:00	E	3.1	7.6	59
1899-12-31 19:12:00	ENE	3.3	7.6	59
1899-12-31 19:13:00	ENE	3.6	7.6	59
1899-12-31 19:14:00	ENE	3.9	7.7	59
1899-12-31 19:15:00	ENE	4.2	7.7	59
1899-12-31 19:16:00	ENE	3.8	7.7	59
1899-12-31 19:17:00	E	3.2	7.7	59
1899-12-31 19:18:00	E	3.6	7.7	59
1899-12-31 19:19:00	E	4	7.6	59
1899-12-31 19:20:00	E	5.3	7.6	59
1899-12-31 19:21:00	ENE	4.4	7.6	59
1899-12-31 19:22:00	E	4	7.5	59
1899-12-31 19:23:00	E	3.8	7.5	59
1899-12-31 19:24:00	E	4.8	7.5	59
1899-12-31 19:25:00	E	4.5	7.5	59
1899-12-31 19:26:00	E	3.6	7.5	59
1899-12-31 19:27:00	E	3.4	7.5	58
1899-12-31 19:28:00	E	4	7.5	59
1899-12-31 19:29:00	E	4	7.5	59
1899-12-31 19:30:00	E	3.7	7.5	59
1899-12-31 19:31:00	E	3.2	7.6	59
1899-12-31 19:32:00	E	4	7.5	59
1899-12-31 19:33:00	ENE	3.5	7.5	59
1899-12-31 19:34:00	ENE	2.6	7.5	59
1899-12-31 19:35:00	ENE	2.7	7.5	59
1899-12-31 19:36:00	E	3.4	7.5	59
1899-12-31 19:37:00	ENE	4.5	7.5	58
1899-12-31 19:38:00	E	3.1	7.5	59
1899-12-31 19:39:00	E	4.1	7.4	59
1899-12-31 19:40:00	E	3.2	7.4	59
1899-12-31 19:41:00	E	4.4	7.4	59
1899-12-31 19:42:00	E	3.8	7.4	59
1899-12-31 19:43:00	E	3.7	7.4	59
1899-12-31 19:44:00	ENE	3.2	7.4	59
1899-12-31 19:45:00	ENE	3.2	7.4	59
1899-12-31 19:46:00	E	2.9	7.3	59
1899-12-31 19:47:00	ENE	4.2	7.4	59
1899-12-31 19:48:00	ENE	4	7.4	59
1899-12-31 19:49:00	ENE	3.6	7.4	59
1899-12-31 19:50:00	ENE	3.8	7.3	59
1899-12-31 19:51:00	ENE	4.3	7.3	59
1899-12-31 19:52:00	E	3.2	7.3	59
1899-12-31 19:53:00	E	3.2	7.3	60
1899-12-31 19:54:00	E	4	7.2	59
1899-12-31 19:55:00	ENE	4.1	7.2	59
1899-12-31 19:56:00	ENE	4.1	7.2	59
1899-12-31 19:57:00	ENE	4.2	7.2	59
1899-12-31 19:58:00	ENE	4.1	7.1	59
1899-12-31 19:59:00	ENE	4.8	7.1	59
1899-12-31 20:00:00	ENE	4	7.1	59
1899-12-31 20:01:00	ENE	5.4	7.1	60
1899-12-31 20:02:00	ENE	4.7	7.1	60
1899-12-31 20:03:00	ENE	5	7.1	60
1899-12-31 20:04:00	ENE	4.6	7	60
1899-12-31 20:05:00	ENE	4.4	7	60
1899-12-31 20:06:00	ENE	4.3	7	60
1899-12-31 20:07:00	ENE	3.7	6.9	60
1899-12-31 20:08:00	E	3.4	6.9	61
1899-12-31 20:09:00	ENE	3.2	7	60
1899-12-31 20:10:00	E	4	6.9	60
1899-12-31 20:11:00	ENE	4	6.9	60
1899-12-31 20:12:00	E	4.2	6.9	60
1899-12-31 20:13:00	E	4.2	6.9	60
1899-12-31 20:14:00	ENE	3.8	6.9	60
1899-12-31 20:15:00	E	4.1	6.9	60
1899-12-31 20:16:00	E	4.4	6.9	60
1899-12-31 20:17:00	E	2.9	6.9	60
1899-12-31 20:18:00	ENE	3.1	6.8	60
1899-12-31 20:19:00	E	3	6.8	60
1899-12-31 20:20:00	ENE	4.4	6.8	60
1899-12-31 20:21:00	E	3.1	6.8	60
1899-12-31 20:22:00	ENE	4.1	6.8	60
1899-12-31 20:23:00	E	3.7	6.8	60
1899-12-31 20:24:00	ENE	3.9	6.8	60
1899-12-31 20:25:00	ENE	3.5	6.8	60
1899-12-31 20:26:00	ENE	3.4	6.7	60
1899-12-31 20:27:00	ENE	3.6	6.7	60
1899-12-31 20:28:00	ENE	3.8	6.7	60
1899-12-31 20:29:00	ENE	3.2	6.7	60
1899-12-31 20:30:00	E	3.2	6.7	60
1899-12-31 20:31:00	ENE	3.1	6.7	60
1899-12-31 20:32:00	ENE	3.7	6.7	60
1899-12-31 20:33:00	ENE	3.7	6.7	60
1899-12-31 20:34:00	ENE	2.7	6.7	60
1899-12-31 20:35:00	E	2.7	6.6	60
1899-12-31 20:36:00	ENE	2.8	6.6	60
1899-12-31 20:37:00	E	2.6	6.7	60
1899-12-31 20:38:00	ENE	2.7	6.6	60
1899-12-31 20:39:00	E	2.2	6.6	60
1899-12-31 20:40:00	E	1.8	6.6	60
1899-12-31 20:41:00	E	1.9	6.5	60
1899-12-31 20:42:00	ENE	2	6.6	60
1899-12-31 20:43:00	E	2.3	6.6	61
1899-12-31 20:44:00	E	1.6	6.7	60
1899-12-31 20:45:00	E	2.6	6.6	60
1899-12-31 20:46:00	ENE	2.7	6.6	60
1899-12-31 20:47:00	E	2.5	6.7	60
1899-12-31 20:48:00	E	2.5	6.7	60
1899-12-31 20:49:00	ENE	2.4	6.6	60
1899-12-31 20:50:00	E	2.7	6.7	60
1899-12-31 20:51:00	E	2.3	6.8	60
1899-12-31 20:52:00	ENE	2.2	6.8	60
1899-12-31 20:53:00	E	2	6.8	60
1899-12-31 20:54:00	E	2.1	6.7	60
1899-12-31 20:55:00	E	1.5	6.6	60
1899-12-31 20:56:00	E	2.6	6.6	60
1899-12-31 20:57:00	E	2.6	6.7	60
1899-12-31 20:58:00	ESE	2.2	6.7	60
1899-12-31 20:59:00	E	2.2	6.7	60
1899-12-31 21:00:00	E	2.9	6.7	60
1899-12-31 21:01:00	ESE	2.2	6.7	60
1899-12-31 21:02:00	ESE	2	6.7	60
1899-12-31 21:03:00	ESE	2.2	6.7	60
1899-12-31 21:04:00	ESE	1.7	6.6	60
1899-12-31 21:05:00	ESE	2.1	6.5	60
1899-12-31 21:06:00	ESE	2.2	6.6	60
1899-12-31 21:07:00	E	2.6	6.6	60
1899-12-31 21:08:00	ESE	2.3	6.7	60
1899-12-31 21:09:00	ESE	1.7	6.6	60
1899-12-31 21:10:00	ESE	2.6	6.6	60
1899-12-31 21:11:00	ESE	2.1	6.5	60
1899-12-31 21:12:00	ESE	2.7	6.5	60
1899-12-31 21:13:00	ESE	3	6.5	61
1899-12-31 21:14:00	ESE	2.2	6.5	60
1899-12-31 21:15:00	ESE	2.4	6.4	61
1899-12-31 21:16:00	ESE	2.3	6.3	61
1899-12-31 21:17:00	ESE	2.1	6.3	61
1899-12-31 21:18:00	ESE	2.6	6.3	61
1899-12-31 21:19:00	ESE	2.1	6.3	61
1899-12-31 21:20:00	E	2.2	6.3	61
1899-12-31 21:21:00	E	1.9	6.3	61
1899-12-31 21:22:00	E	2	6.3	61
1899-12-31 21:23:00	E	1.9	6.3	62
1899-12-31 21:24:00	E	1.7	6.2	62
1899-12-31 21:25:00	E	1.6	6.2	62
1899-12-31 21:26:00	ENE	2.6	6.2	62
1899-12-31 21:27:00	NNE	4.3	6.2	58
1899-12-31 21:28:00	NE	4.5	6.2	59
1899-12-31 21:29:00	NE	2.3	6.2	58
1899-12-31 21:30:00	NE	4.8	6.1	55
1899-12-31 21:31:00	NE	4.6	6	54
1899-12-31 21:32:00	NNE	4.9	5.9	54
1899-12-31 21:33:00	NNE	4.7	5.9	54
1899-12-31 21:34:00	NNE	4.3	5.8	53
1899-12-31 21:35:00	NNE	3.8	5.7	52
1899-12-31 21:36:00	NE	5.6	5.7	52
1899-12-31 21:37:00	NNW	4.3	5.7	51
1899-12-31 21:38:00	NNE	4.6	5.7	51
1899-12-31 21:39:00	NNE	5.3	5.6	49
1899-12-31 21:40:00	NNE	4.5	5.5	49
1899-12-31 21:41:00	N	3.6	5.5	50
1899-12-31 21:42:00	NNE	4.8	5.5	49
1899-12-31 21:43:00	N	3.6	5.4	49
1899-12-31 21:44:00	NNE	4.9	5.3	49
1899-12-31 21:45:00	NNE	5.2	5.4	50
1899-12-31 21:46:00	NNE	4.8	5.3	50
1899-12-31 21:47:00	NNE	4.6	5.4	50
1899-12-31 21:48:00	NNE	3.9	5.4	50
1899-12-31 21:49:00	N	3.7	5.4	50
1899-12-31 21:50:00	NNE	3.6	5.3	50
1899-12-31 21:51:00	NNE	4	5.2	49
1899-12-31 21:52:00	NNE	2	5.2	49
1899-12-31 21:53:00	NNE	3.6	5.1	49
1899-12-31 21:54:00	NNE	4	5	49
1899-12-31 21:55:00	NE	4.8	5	48
1899-12-31 21:56:00	NNE	3.8	5.1	48
1899-12-31 21:57:00	NNE	4.6	5	48
1899-12-31 21:58:00	NNE	4	5	48
1899-12-31 21:59:00	NNE	4.3	4.9	49
1899-12-31 22:00:00	NNE	3.9	4.9	48
1899-12-31 22:01:00	NNE	3.9	4.9	47
1899-12-31 22:02:00	NNE	4.3	4.9	47
1899-12-31 22:03:00	NNE	5	4.9	47
1899-12-31 22:04:00	NNE	3.8	4.9	47
1899-12-31 22:05:00	NNE	3.7	4.9	47
1899-12-31 22:06:00	NNE	4	4.9	47
1899-12-31 22:07:00	NNE	3.8	4.9	46
1899-12-31 22:08:00	NE	3.7	4.8	47
1899-12-31 22:09:00	NE	4.1	4.8	47
1899-12-31 22:10:00	NE	4.7	4.8	47
1899-12-31 22:11:00	NE	4.5	4.8	46
1899-12-31 22:12:00	NNE	3.7	4.7	47
1899-12-31 22:13:00	NNE	3.9	4.7	48
1899-12-31 22:14:00	NNE	3.4	4.6	48
1899-12-31 22:15:00	NNE	4.3	4.6	47
1899-12-31 22:16:00	NE	3.7	4.7	47
1899-12-31 22:17:00	NE	4.4	4.7	47
1899-12-31 22:18:00	NE	4.1	4.8	46
1899-12-31 22:19:00	NE	4	4.7	46
1899-12-31 22:20:00	NE	4.5	4.7	46
1899-12-31 22:21:00	NE	3.8	4.7	46
1899-12-31 22:22:00	NNE	3.6	4.7	45
1899-12-31 22:23:00	NE	4.3	4.7	45
1899-12-31 22:24:00	NE	4.1	4.6	45
1899-12-31 22:25:00	NE	4.7	4.6	44
1899-12-31 22:26:00	NNE	4.9	4.6	44
1899-12-31 22:27:00	NE	4.9	4.6	44
1899-12-31 22:28:00	NE	4	4.5	45
1899-12-31 22:29:00	NE	4.4	4.5	45
1899-12-31 22:30:00	NE	4.3	4.5	45
1899-12-31 22:31:00	NE	4.5	4.5	45
1899-12-31 22:32:00	NE	4.1	4.5	45
1899-12-31 22:33:00	NE	4	4.5	45
1899-12-31 22:34:00	NE	4.1	4.5	45
1899-12-31 22:35:00	NE	4	4.4	45
1899-12-31 22:36:00	NE	3.6	4.4	45
1899-12-31 22:37:00	NE	3.6	4.5	45
1899-12-31 22:38:00	NE	4.2	4.4	44
1899-12-31 22:39:00	NE	3.7	4.4	45
1899-12-31 22:40:00	NE	3.5	4.3	45
1899-12-31 22:41:00	NE	3.4	4.4	45
1899-12-31 22:42:00	NE	4.2	4.4	45
1899-12-31 22:43:00	NNE	4.2	4.4	45
1899-12-31 22:44:00	NE	4.1	4.3	45
1899-12-31 22:45:00	NE	4.7	4.3	44
1899-12-31 22:46:00	NE	4.2	4.4	44
1899-12-31 22:47:00	NE	3.7	4.3	45
1899-12-31 22:48:00	NE	4.1	4.3	45
1899-12-31 22:49:00	NE	4.1	4.3	45
1899-12-31 22:50:00	NE	4.4	4.3	45
1899-12-31 22:51:00	NE	3.8	4.3	45
1899-12-31 22:52:00	NE	3.3	4.3	45
1899-12-31 22:53:00	NE	3.9	4.3	46
1899-12-31 22:54:00	NE	3.5	4.3	46
1899-12-31 22:55:00	NE	3.3	4.3	46
1899-12-31 22:56:00	NE	3.7	4.3	46
1899-12-31 22:57:00	NE	3	4.3	47
1899-12-31 22:58:00	NE	2.7	4.3	47
1899-12-31 22:59:00	NE	2.8	4.2	48
1899-12-31 23:00:00	NE	2.8	4.2	48
1899-12-31 23:01:00	NE	3.7	4.2	48
1899-12-31 23:02:00	NE	3.4	4.2	48
1899-12-31 23:03:00	ENE	3.2	4.2	48
1899-12-31 23:04:00	ENE	3.4	4.2	48
1899-12-31 23:05:00	ENE	3.7	4.2	48
1899-12-31 23:06:00	NE	3	4.2	48
1899-12-31 23:07:00	NE	2.9	4.2	48
1899-12-31 23:08:00	ENE	2.7	4.1	48
1899-12-31 23:09:00	NE	2.5	4.1	49
1899-12-31 23:10:00	ENE	3	4	49
1899-12-31 23:11:00	ENE	2.8	4	49
1899-12-31 23:12:00	ENE	3.2	4	49
1899-12-31 23:13:00	NE	2.9	4.1	48
1899-12-31 23:14:00	NE	2.7	4.1	48
1899-12-31 23:15:00	NE	3	4.1	48
1899-12-31 23:16:00	NE	3.2	4.1	48
1899-12-31 23:17:00	NE	3.6	4	48
1899-12-31 23:18:00	ENE	3.2	4	48
1899-12-31 23:19:00	NE	3	4	48
1899-12-31 23:20:00	ENE	3.9	4	47
1899-12-31 23:21:00	ENE	3.5	4	48
1899-12-31 23:22:00	ENE	3.2	4	48
1899-12-31 23:23:00	NE	2.9	3.9	48
1899-12-31 23:24:00	ENE	3.1	3.9	48
1899-12-31 23:25:00	NE	3.2	3.9	48
1899-12-31 23:26:00	NE	2.8	3.9	48
1899-12-31 23:27:00	NE	3.6	3.9	48
1899-12-31 23:28:00	ENE	3	3.8	48
1899-12-31 23:29:00	ENE	3.6	3.8	48
1899-12-31 23:30:00	ENE	3.4	3.8	48
1899-12-31 23:31:00	ENE	3.5	3.8	48
1899-12-31 23:32:00	NE	3.1	3.8	48
1899-12-31 23:33:00	NE	3.5	3.8	47
1899-12-31 23:34:00	NE	3.6	3.8	47
1899-12-31 23:35:00	NE	3.4	3.9	48
1899-12-31 23:36:00	NE	3.1	3.9	47
1899-12-31 23:37:00	NE	3.8	3.9	47
1899-12-31 23:38:00	NE	4	3.9	47
1899-12-31 23:39:00	NE	3.2	3.8	47
1899-12-31 23:40:00	NE	3.4	3.8	47
1899-12-31 23:41:00	NE	3.3	3.9	47
1899-12-31 23:42:00	NE	4.1	3.9	47
1899-12-31 23:43:00	NE	3.8	3.9	47
1899-12-31 23:44:00	NE	4	3.8	48
1899-12-31 23:45:00	NE	3.4	3.8	48
1899-12-31 23:46:00	NE	3.8	3.8	48
1899-12-31 23:47:00	NE	4.7	3.8	47
1899-12-31 23:48:00	NE	3.6	3.8	48
1899-12-31 23:49:00	NE	4.3	3.8	47
1899-12-31 23:50:00	NE	3.7	3.8	48
1899-12-31 23:51:00	NE	4.2	3.8	47
1899-12-31 23:52:00	NE	4.2	3.8	48
1899-12-31 23:53:00	NE	3.7	3.8	48
1899-12-31 23:54:00	NNE	3.8	3.8	47
1899-12-31 23:55:00	NNE	3.7	3.8	47
1899-12-31 23:56:00	NE	4.4	3.8	47
1899-12-31 23:57:00	NE	3.9	3.8	47
1899-12-31 23:58:00	NE	3.9	3.9	47
1899-12-31 23:59:00	NE	4	3.9	46
